# Supplementary material for: The dual role of heme oxygenase in regulating apoptosis in the nervous system of Drosophila melanogaster
Source: Frontiers journal article supplement (doi:10.3389/fphys.2023.1060175), 2023-02-13
Supplement: Data_Sheet_1.pdf [file Data_Sheet_1.pdf]

## Supplementary Material

### Supplementary Figure

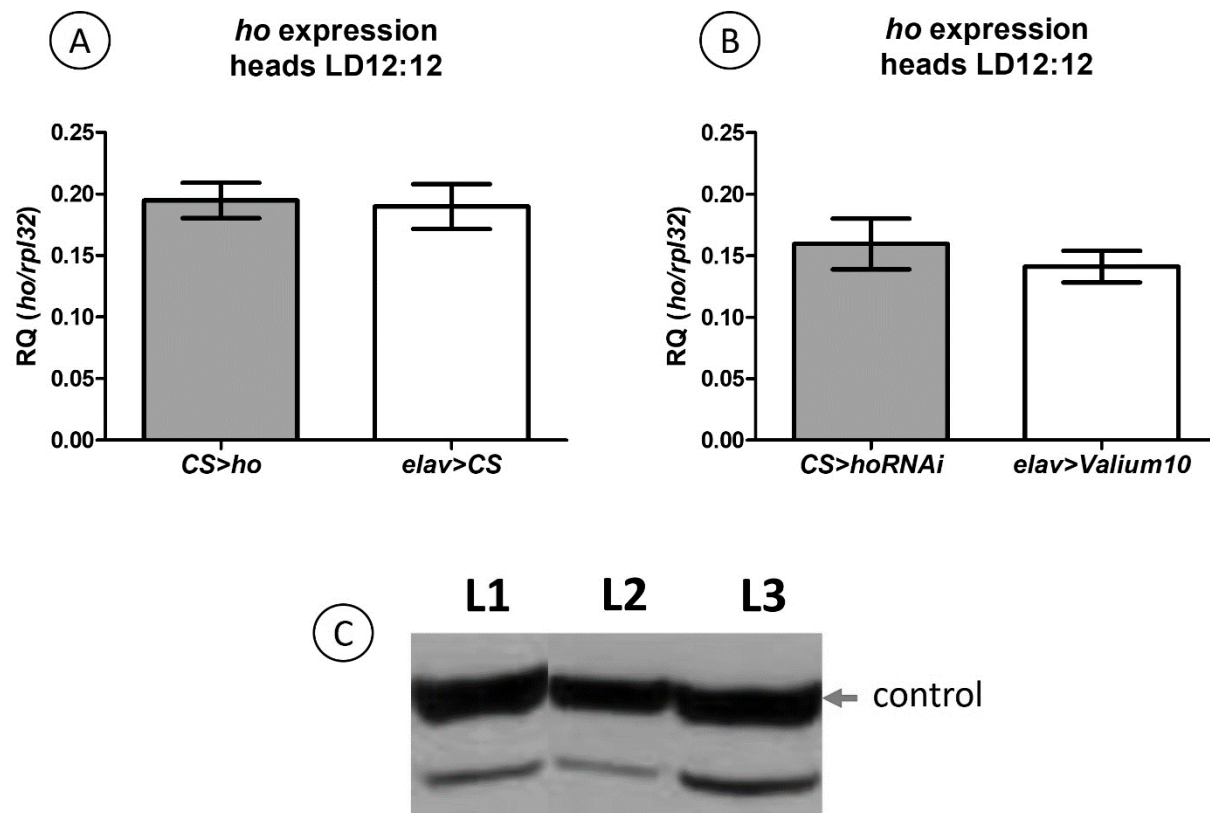

**Supplementary Figure 1.** The expression of the *ho* gene did not change between control groups (A-B). Protein levels were also confirmed to be overexpressed or silenced in the experimental flies (C) with the following ratio: CS (L1) = 0.282, *elav>hoRNAi* (L2) = 0.167, and *elav>ho* (L3) = 0.445.

## Supplementary Tables

**Supplementary Table 1.** Exact  $p$  values for each dopaminergic neuron (DA) cluster of the different combinations between genotypes and/or age groups.

| <b>7- vs 30-day-old</b>                                 |            |     |                                                          |            |     |                  |            |     |
|---------------------------------------------------------|------------|-----|----------------------------------------------------------|------------|-----|------------------|------------|-----|
| Genotype                                                | DA cluster | $p$ | Genotype                                                 | DA cluster | $p$ | Genotype         | DA cluster | $p$ |
| <i>ple&gt;ho</i>                                        | PAL        | 0.2 | <i>ple&gt;hoRNAi</i>                                     | PAL        | 0.2 | <i>ple&gt;CS</i> | PAL        | 0.2 |
|                                                         | PPL1       | 0.3 |                                                          | PPL1       | 1.0 |                  | PPL1       | 0.4 |
|                                                         | PPL2       | 0.2 |                                                          | PPL2       | 0.4 |                  | PPL2       | 0.2 |
|                                                         | PPM1/2     | 0.7 |                                                          | PPM1/2     | 0.8 |                  | PPM1/2     | 0.6 |
|                                                         | PPM3       | 0.2 |                                                          | PPM3       | 1.0 |                  | PPM3       | 0.1 |
| <i>ple&gt;ho</i> vs <i>ple&gt;CS</i><br>(7-day-old)     |            |     | <i>ple&gt;ho</i> vs <i>ple&gt;CS</i><br>(30-day-old)     |            |     |                  |            |     |
| DA cluster                                              | $p$        |     | DA cluster                                               | $p$        |     |                  |            |     |
| PAL                                                     | < 0.0001   |     | PAL                                                      | < 0.0001   |     |                  |            |     |
| PPL1                                                    | < 0.0001   |     | PPL1                                                     | < 0.0001   |     |                  |            |     |
| PPL2                                                    | < 0.0001   |     | PPL2                                                     | < 0.0001   |     |                  |            |     |
| PPM1/2                                                  | < 0.0001   |     | PPM1/2                                                   | < 0.0001   |     |                  |            |     |
| PPM3                                                    | < 0.0001   |     | PPM3                                                     | < 0.0001   |     |                  |            |     |
| <i>ple&gt;hoRNAi</i> vs <i>ple&gt;CS</i><br>(7-day-old) |            |     | <i>ple&gt;hoRNAi</i> vs <i>ple&gt;CS</i><br>(30-day-old) |            |     |                  |            |     |
| DA cluster                                              | $p$        |     | DA cluster                                               | $p$        |     |                  |            |     |
| PAL                                                     | < 0.0001   |     | PAL                                                      | < 0.0001   |     |                  |            |     |
| PPL1                                                    | < 0.0001   |     | PPL1                                                     | < 0.0001   |     |                  |            |     |
| PPL2                                                    | < 0.0001   |     | PPL2                                                     | 0.3        |     |                  |            |     |
| PPM1/2                                                  | < 0.0001   |     | PPM1/2                                                   | < 0.0001   |     |                  |            |     |
| PPM3                                                    | < 0.0001   |     | PPM3                                                     | 0.03       |     |                  |            |     |

**Supplementary Table 2.** Exact *p* values of the percentage of survival and climbing ability, including *hid* expression, of the different combinations between genotypes and treated or non-treated groups. The non-parametric ANOVA Kruskal-Wallis test was used to analyse each combination.

| % survival                                                      |           |          |                                                                               |           |          |
|-----------------------------------------------------------------|-----------|----------|-------------------------------------------------------------------------------|-----------|----------|
| Genotype                                                        | Treatment | <i>p</i> | Genotype                                                                      | Treatment | <i>p</i> |
| <i>elav&gt;ho</i> vs<br><i>elav&gt;CS</i> vs<br><i>CS&gt;ho</i> | CTR       | 0.02     | <i>elav&gt;hoRNAi</i> vs<br><i>elav&gt;Valium10</i> vs<br><i>CS&gt;hoRNAi</i> | CTR       | 0.02     |
|                                                                 | CUR       | 0.003    |                                                                               | CUR       | 0.03     |
| % climbing ability                                              |           |          |                                                                               |           |          |
| Genotype                                                        | Treatment | <i>p</i> | Genotype                                                                      | Treatment | <i>p</i> |
| <i>elav&gt;ho</i> vs<br><i>elav&gt;CS</i> vs<br><i>CS&gt;ho</i> | CTR       | 0.1      | <i>elav&gt;hoRNAi</i> vs<br><i>elav&gt;Valium10</i> vs<br><i>CS&gt;hoRNAi</i> | CTR       | 0.05     |
|                                                                 | CUR       | 0.2      |                                                                               | CUR       | 0.6      |
| <i>hid</i> expression                                           |           |          |                                                                               |           |          |
| Genotype                                                        | Treatment | <i>p</i> | Genotype                                                                      | Treatment | <i>p</i> |
| <i>elav&gt;ho</i> vs<br><i>elav&gt;CS</i> vs<br><i>CS&gt;ho</i> | CTR       | 0.07     | <i>elav&gt;hoRNAi</i> vs<br><i>elav&gt;Valium10</i> vs<br><i>CS&gt;hoRNAi</i> | CTR       | 0.02*    |
|                                                                 | CUR       | 0.01     |                                                                               | CUR       | 0.8      |

\*inconsistent significant result (one parental control is not different from the experimental group)
